# Supplementary material for: The Electro-Optical Properties and Adhesion Strength of Epoxy-Polymercaptan-Based Polymer Dispersed Liquid Crystal Films
Source: MDPI journal article supplement (doi:10.3390/cryst11060576), 2021-05-21
Supplement: s1 [file s1]

*Supporting Information for*

# **The electro-optical properties and adhesion strength of epoxy-polymercaptan-based polymer dispersed liquid crystal films**

**Gang Chen <sup>1,†</sup>, Wei Hu <sup>2,†</sup>, Le Zhou <sup>2</sup>, Huimin Zhang <sup>3</sup>, Ling Wang <sup>4</sup>, Cuihong Zhang <sup>3</sup>, Jian Sun <sup>2</sup>, Lanying Zhang <sup>2,\*</sup>, Xiaotao Yuan <sup>5,\*</sup> and Siqian Zhu <sup>1,6,\*</sup>**

<sup>1</sup> School of Materials Science and Engineering, University of Science and Technology Beijing, Beijing 100083, China; chengang6833@163.com

<sup>2</sup> Department of Materials Science and Engineering, College of Engineering, Peking University, Beijing 100871, China; work.huwei@pku.edu.cn (W.H.); zhoule@pku.edu.cn (L.Z.); sun6jian10@pku.edu.cn (J.S.)

<sup>3</sup> Key Laboratory of Organic Polymer Photoelectric Materials, School of Science, Xijing University, Xi'an 710123, China; zhanghuimin850214@126.com (H.Z.); cuicui1008@126.com (C.Z.)

<sup>4</sup> School of Materials Science and Engineering, Tianjin University, Tianjin 300072, China; lwang17@tju.edu.cn

<sup>5</sup> Department of Chemistry and Chemical Engineering, School of Chemistry and Biological Engineering, University of Science and Technology Beijing, Beijing 100083, China

<sup>6</sup> Department of Ophthalmology, Beijing Anzhen Hospital of Capital Medical University, Beijing 100020, China

\* Correspondence: zhanglanying@pku.edu.cn (L.Z.); yuanxt@ustb.edu.cn (X.Y.); siquanzhu@sina.com (S.Z.)

† These authors contributed equally to this work.

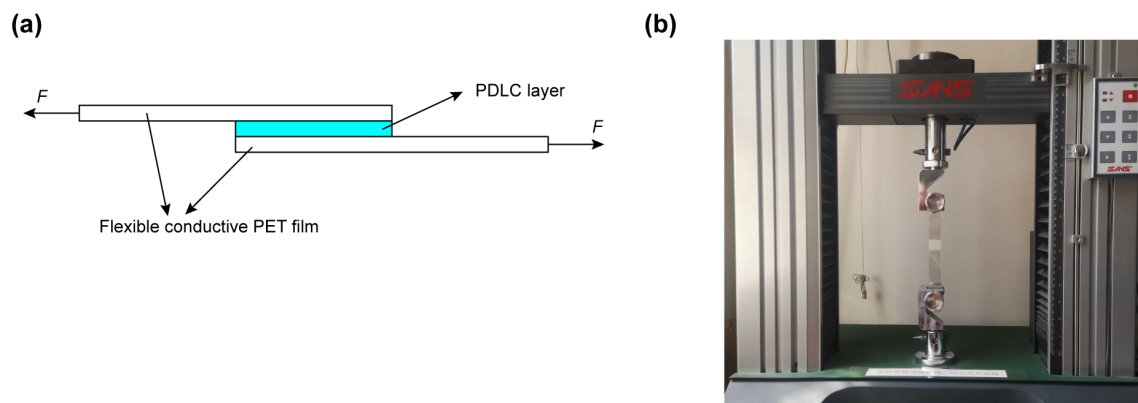

Figure S1. The measurement of the adhesion strength of the PDLC films: (a) The principle illustration of the measurement of the adhesion strength; (b) the digital photograph of the adhesion strength testing process.
